# Supplementary material for: r.avaflow v1, an advanced open-source computational framework for the propagation and interaction of two-phase mass flows
Source: Copernicus journal article supplement (doi:10.5194/gmd-10-553-2017), 2017-02-06
Supplement: Supplementary file 1 [file gmd-10-553-2017-supplement.zip]

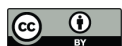

## *Supplement of*

# **r.avaflow v1, an advanced open-source computational framework for the propagation and interaction of two-phase mass flows**

**M. Mergili et al.**

*Correspondence to:* Martin Mergili ([martin.mergili@boku.ac.at](mailto:martin.mergili@boku.ac.at))

- [gmd-10-553-2017-supplement-title-page.pdf](#)
- [Animation1A.gif](#)
- [Animation1B.gif](#)
- [Animation1C.gif](#)
- [Animation2.gif](#)

The copyright of individual parts of the supplement might differ from the CC-BY 3.0 licence.
